# Supplementary material for: Slow progressors to type 1 diabetes lose islet autoantibodies over time, have few islet antigen-specific CD8+ T cells and exhibit a distinct CD95hi B cell phenotype
Source: PubMed Central journal article supplement (PMC7228996; doi:10.1007/s00125-020-05114-7), 2020-03-10
Supplement: 125_2020_5114_MOESM1_ESM.pdf [file 125_2020_5114_MOESM1_ESM.pdf]

## **Electronic Supplementary Material (ESM)**

### **Slow progressors to type 1 diabetes lose islet autoantibodies over time, have few islet antigen-specific CD8<sup>+</sup> T cells and exhibit a distinct CD95<sup>hi</sup> B cell phenotype**

Stephanie J. Hanna<sup>1</sup>, Wendy E. Powell<sup>1</sup>, Anna E. Long<sup>2</sup>, Emma J. S. Robinson<sup>1</sup>, Joanne Davies<sup>1</sup>, Clare Megson<sup>2</sup>, Alexandra Howell<sup>1</sup>, Taz J. Jones<sup>1</sup>, Kristin Ladell<sup>1</sup>, David A. Price<sup>1</sup>, Colin M. Dayan<sup>1</sup>, Alistair J. K. Williams<sup>2</sup>, Kathleen M. Gillespie<sup>2</sup> and F. Susan Wong<sup>1</sup>

1. Division of Infection and Immunity, Cardiff University School of Medicine, Heath Park, Cardiff CF14 4XN, UK

2. Diabetes and Metabolism, Bristol Medical School, University of Bristol, Bristol, UK

Stephanie J. Hanna, Wendy E. Powell, Anna E. Long and Emma J. S. Robinson contributed equally to this work. Kathleen M. Gillespie and F. Susan Wong are joint senior authors.

### **Abbreviations**

|    |                                 |
|----|---------------------------------|
| HD | healthy donors                  |
| LS | long-standing type 1 diabetes   |
| ND | newly diagnosed type 1 diabetes |
| SP | slow progressors                |

ESM Table 1

a

|           | Number | Mean age (yrs) | Age range (yrs) | Mean disease duration (yrs) | Range of disease duration (yrs) |
|-----------|--------|----------------|-----------------|-----------------------------|---------------------------------|
| HD male   | 14     | 34.6           | 18–72           | -                           | -                               |
| HD female | 9      | 34.2           | 20–55           | -                           | -                               |
| SP male   | 6      | 34.5           | 28–69           | -                           | -                               |
| SP female | 4      | 43.3           | 33–55           | -                           | -                               |
| ND male   | 12     | 31.3           | 19–45           | 0.4                         | 0.1–1.0                         |
| ND female | 6      | 29.0           | 18–50           | 0.4                         | 0.1–0.9                         |
| LS male   | 10     | 38.4           | 20–48           | 23.1                        | 3–38                            |
| LS female | 8      | 34.1           | 18–49           | 18.9                        | 3–36                            |

b

|      | Gender | Age (years) | HLA Class II DRB1 genotyping |                      | GADA (DK units/ml) | IA-2A (DK units/ml) | ZnT8A (units/ml) | IAA (units/ml) |
|------|--------|-------------|------------------------------|----------------------|--------------------|---------------------|------------------|----------------|
| HD1  | M      | 52          | *0701-0702                   | *0901                | 4.15               | 0.00                | 0.41             | 0.00           |
| HD2  | M      | 26          | *0401-0422                   | *0805-0801           | 0.00               | 0.00                | 0.49             | 0.00           |
| HD3  | M      | 34          | *0401-0422                   | *1302-1305/1303-1304 | 0.00               | 0.00                | 0.34             | 0.00           |
| HD4  | M      | 37          | *0701-0702                   | *1001                | 0.33               | 0.00                | 0.33             | 0.00           |
| HD5  | M      | 72          | *0101-0103                   | -                    | 0.00               | 0.00                | 1.01             | 0.00           |
| HD6  | M      | 41          | *0401-0422                   | *0701-0702           | 0.00               | 0.00                | 0.49             | 0.00           |
| HD7  | M      | 18          | *1501-1505                   | *0701-0702           | 0.00               | 0.00                | 0.46             | 0.00           |
| HD8  | M      | 29          | *0401-0422                   | *1302-1305/1303-1304 | 0.00               | 0.00                | 0.31             | 0.00           |
| HD9  | M      | 34          | *1501-1505                   | *0701-0702           | 24.53              | 0.00                | 1.01             | 0.00           |
| HD10 | M      | 29          | *0301                        | -                    | 0.00               | 0.00                | 0.21             | 0.00           |
| HD11 | M      | 22          | *1101-1121                   | *1302-1305/1303-1304 | 0.00               | 0.00                | 0.29             | 0.00           |
| HD12 | M      | 21          | *1501-1505                   | -                    | 0.00               | 0.00                | 0.40             | 0.00           |
| HD13 | M      | 24          | *0401-0422                   | *0701-0702           | 0.00               | 0.00                | 0.45             | 0.00           |
| HD14 | M      | 46          | *0101-0103                   | *0301                | 4.49               | 0.00                | 0.29             | 0.00           |
| HD15 | F      | 21          | *0701-0702                   | -                    | 0.00               | 0.00                | 0.32             | 0.00           |
| HD16 | F      | 49          | *0301                        | *0701-0702           | 0.00               | 0.00                | 0.39             | 0.00           |
| HD17 | F      | 24          | *1501-1505                   | *0701-0702           | 0.00               | 0.00                | 0.43             | 0.00           |
| HD18 | F      | 20          | *0301                        | *0701-0702           | 0.00               | 0.00                | 0.72             | 0.00           |
| HD19 | F      | 38          | *0101-0103                   | *0401-0422           | 0.00               | 0.00                | 0.54             | 0.00           |
| HD20 | F      | 44          | *0401-0422                   | *1101-1121           | nk                 | nk                  | nk               | nk             |
| HD21 | F      | 33          | *0301                        | *0805-0801           | 0.00               | 0.00                | 0.15             | 0.00           |
| HD22 | F      | 55          | *1302-1305/1303-1304         | -                    | 0.00               | 0.00                | 0.45             | 0.00           |
| HD23 | F      | 24          | *0401-0422                   | -                    | nk                 | nk                  | nk               | nk             |
| SP1  | M      | 28          | *0101-0103                   | *0301                | 309.30             | 0.00                | 0.38             | 0.00           |
| SP2  | M      | 41          | *0301                        | *0401-0422           | 176.00             | 8.20                | 6.70             | 0.00           |
| SP3  | M      | 69          | *0401-0422                   | *1201-1203           | 82.25              | 0.00                | 92.86            | 0.00           |
| SP4  | M      | 53          | *0401-0422                   | *0701-0702           | 715.30             | 5.96                | 0.44             | 0.82           |
| SP5  | M      | 46          | *0401-0422                   | *1501-1505           | 55.01              | 0.00                | 0.47             | 0.00           |
| SP6  | M      | 31          | *0301                        | *0401-0422           | 146.59             | 0.00                | 4.34             | 0.00           |
| SP7  | F      | 33          | *0101-0103                   | *0301                | 267.26             | 0.00                | 0.70             | 0.00           |
| SP8  | F      | 44          | *0401-0422                   | *1101-1121           | 205.75             | 25.74               | 11.88            | 0.00           |
| SP9  | F      | 55          | *0101-0103                   | *0401-0422           | 456.13             | 0.00                | 0.25             | 0.30           |
| SP10 | F      | 41          | *0401-0422                   | *1001                | 362.95             | 228.42              | 7.13             | 0.00           |

**C**

|      | Gender | Age (years) | Disease duration (yrs) | HLA Class II DRB1 genotyping |                      | GADA (DK units/ml) | IA-2A (DK units/ml) | ZnT8A (units/ml) |
|------|--------|-------------|------------------------|------------------------------|----------------------|--------------------|---------------------|------------------|
| LS1  | M      | 48          | 32.0                   | *0301                        | *0401-0422           | 122.21             | 106.47              | 13.91            |
| LS2  | M      | 33          | 3.0                    | *0301                        | -                    | 183.84             | 81.25               | 0.47             |
| LS3  | M      | 39          | 30.0                   | *0301                        | *0401-0422           | 13.48              | 0.00                | 0.44             |
| LS4  | M      | 20          | 13.0                   | *0101-0103                   | *0301                | 1.73               | 0.00                | 0.29             |
| LS5  | M      | 35          | 22.0                   | *0301                        | *0701-0702           | 51.32              | 0.00                | 0.39             |
| LS6  | M      | 29          | 13.0                   | *0301                        | -                    | 67.57              | 239.50              | 41.41            |
| LS7  | M      | 48          | 36.0                   | *0401-0422                   | -                    | 175.45             | 0.00                | 0.88             |
| LS8  | M      | 45          | 31.0                   | *0401-0422                   | *0701-0702           | 3.00               | 0.00                | 0.65             |
| LS9  | M      | 43          | 13.0                   | *0101-0103                   | *0301                | 5.14               | 1.74                | 0.88             |
| LS10 | M      | 44          | 38.0                   | *0101-0103                   | *0401-0422           | 0.00               | 0.00                | 0.31             |
| LS11 | F      | 33          | 17.0                   | *0101-0103                   | *0401-0422           | 86.75              | 0.00                | 0.37             |
| LS12 | F      | 44          | 14.0                   | *0301                        | -                    | 900.07             | 0.00                | 0.36             |
| LS13 | F      | 34          | 31.0                   | *0401-0422                   | *1302-1305/1303-1304 | 0.00               | 0.08                | 0.49             |
| LS14 | F      | 37          | 13.0                   | *0401-0422                   | *1101-1121           | 79.94              | 2.10                | 0.24             |
| LS15 | F      | 34          | 25.0                   | *0301                        | *0401-0422           | 1.51               | 3.31                | 0.95             |
| LS16 | F      | 24          | 12.0                   | *0301                        | *0401-0422           | 5.37               | 0.00                | 0.41             |
| LS17 | F      | 49          | 36.0                   | *0301                        | *0401-0422           | 16.61              | 0.00                | 0.52             |
| LS18 | F      | 18          | 3.0                    | *0301                        | *0401-0422           | 1,018.96           | 0.00                | 0.51             |
| ND1  | M      | 36          | 0.3                    | *0401-0422                   | -                    | 11.68              | 0.00                | 0.25             |
| ND2  | M      | 28          | 0.1                    | *1501-1505                   | *0401-0422           | 0.00               | 0.00                | 0.46             |
| ND3  | M      | 36          | 0.3                    | *0401-0422                   | *1302-1305/1303-1304 | 221.12             | 271.26              | 170.31           |
| ND4  | M      | 27          | 0.3                    | *0401-0422                   | -                    | 193.87             | 29.82               | 0.41             |
| ND5  | M      | 37          | 0.1                    | *0101-0103                   | *0301                | 869.57             | 267.67              | 126.84           |
| ND6  | M      | 34          | 1.0                    | *0101-0103                   | *0401-0422           | 15.31              | 0.00                | 0.50             |
| ND7  | M      | 45          | 0.9                    | *0301                        | *0701-0702           | 69.99              | 201.51              | 0.54             |
| ND8  | M      | 21          | 0.4                    | *1501-1505                   | -                    | 0.00               | 0.00                | 0.21             |
| ND9  | M      | 24          | 0.7                    | *0301                        | *0401-0422           | 314.61             | 124.11              | 0.28             |
| ND10 | M      | 24          | 0.2                    | *0101-0103                   | *0701-0702           | 345.06             | 0.00                | 0.49             |
| ND11 | M      | 45          | 0.3                    | *0301                        | *0701-0702           | 458.91             | 0.00                | 0.57             |
| ND12 | M      | 19          | 0.3                    | *0301                        | *0701-0702           | 1,015.09           | 300.97              | 0.41             |
| ND13 | F      | 18          | 0.3                    | *0301                        | *0401-0422           | 0.00               | 2.54                | 69.83            |
| ND14 | F      | 50          | 0.7                    | *0301                        | *0401-0422           | 0.00               | 0.00                | 1.97             |
| ND15 | F      | 23          | 0.3                    | *0401-0422                   | -                    | 500.65             | 280.68              | 106.96           |
| ND16 | F      | 23          | 0.9                    | *0301                        | *0401-0422           | 517.54             | 0.00                | 0.26             |
| ND17 | F      | 36          | 0.3                    | *0301                        | *0701-0702           | 663.30             | 110.65              | 0.68             |
| ND18 | F      | 24          | 0.1                    | *0401-0422                   | *1302-1305/1303-1304 | 173.03             | 3.68                | 4.30             |

**ESM Table 1. Clinical, demographic, and immunological characteristics of SPs, people with ND or LS type 1 diabetes, and HDs.** (a) Summary table of demographics (b) HDs' and SPs' demographic and immunological characteristics (c) Clinical, demographic, and immunological characteristics of people with newly diagnosed or long-standing type 1 diabetes. nk: not known. SP6 had autoimmune thyroid disease. Thresholds for seropositive islet autoantibody titres: GADA  $\geq$  33 DK units/ml; IA-2A  $\geq$  1.4 DK units/ml; ZnT8A  $\geq$  1.8 units/ml; IAA  $\geq$  0.2 units/ml. HD, healthy donors; LS, long-standing type 1 diabetes; ND, newly diagnosed type 1 diabetes; SP, slow progressors

## ESM Table 2

| Peptide         | Sequence   | QDot 1 | QDot 2 | Panel |
|-----------------|------------|--------|--------|-------|
| CMV             | NLVPMVATV  | 585    | 800    | A     |
| EBV             | GLCTLVAML  | 655    | 800    | A     |
| non-interfacing | GLFGGGGGV  | 585    | 605    | A     |
| INS b10-18      | HLVEALYLV  | 605    | 655    | B     |
| PI 15-24        | ALWGPDPAAA | 585    | 655    | B     |
| GAD 114-123     | VMNILLQYVV | 655    | 800    | B     |
| IA-2 797-805    | MVWESGCTV  | 585    | 605    | B     |
| IGRP 265-273    | VLFGLGFAI  | 605    | 800    | B     |
| pplAPP 5-13     | KLQVFLIVL  | 585    | 800    | B     |

**ESM Table 2. Peptide-HLA-A2 tetramers used in this study.**

ESM Figure 1

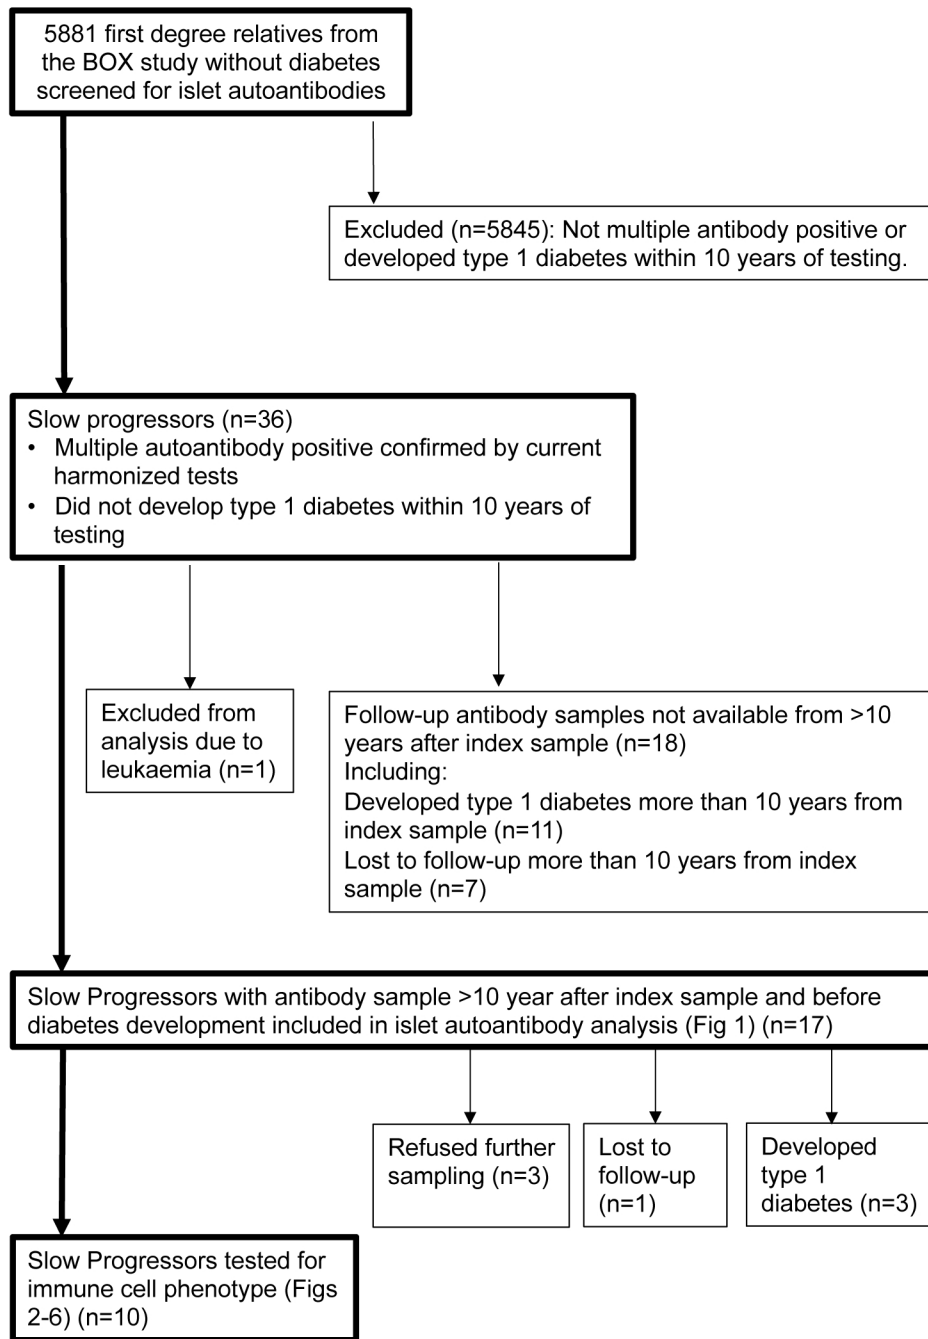

ESM Figure 1: Consort diagram of slow progressors.

ESM Figure 2

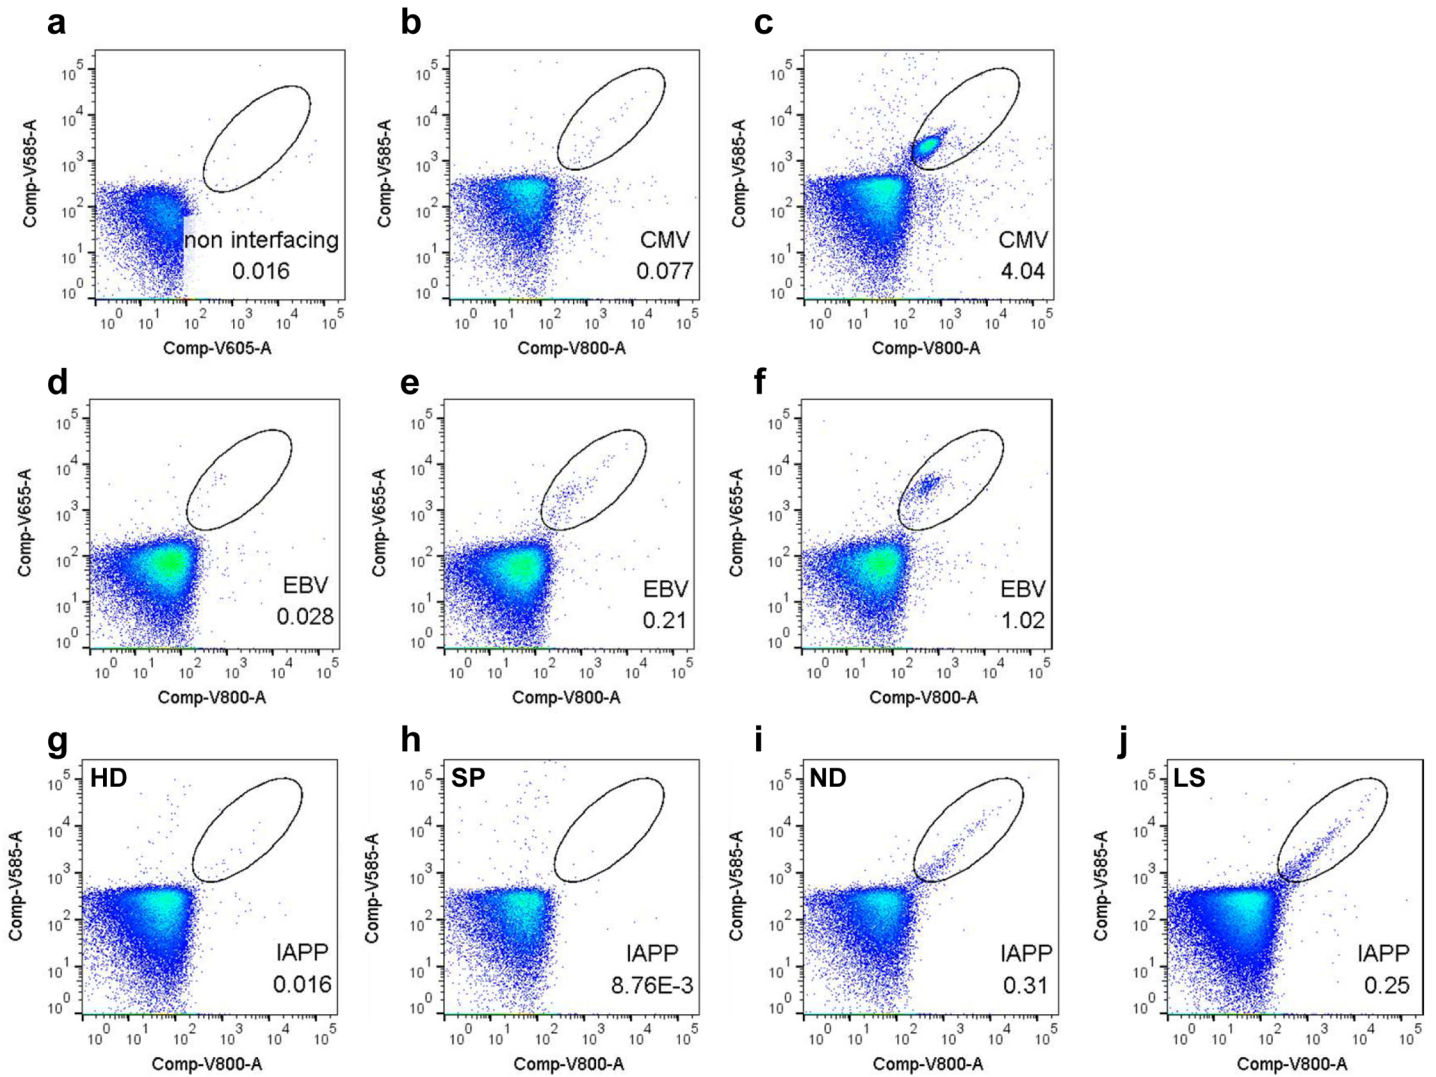

**ESM Figure 2: Representative flow cytometric plots from negative and positive control data in Figure 2, illustrating different levels of response: a. staining with non-interfacing peptide tetramer; b, c. staining with CMV peptide tetramer; d,e,f staining with EBV peptide tetramer; g. staining with IAPP peptide tetramer from HD; h. staining with IAPP peptide tetramer from SP; i. staining with IAPP peptide tetramer from ND; j. staining with IAPP peptide tetramer from LS. HD, healthy donors; LS, long-standing type 1 diabetes; ND, newly diagnosed type 1 diabetes; SP, slow progressors**

### ESM Figure 3

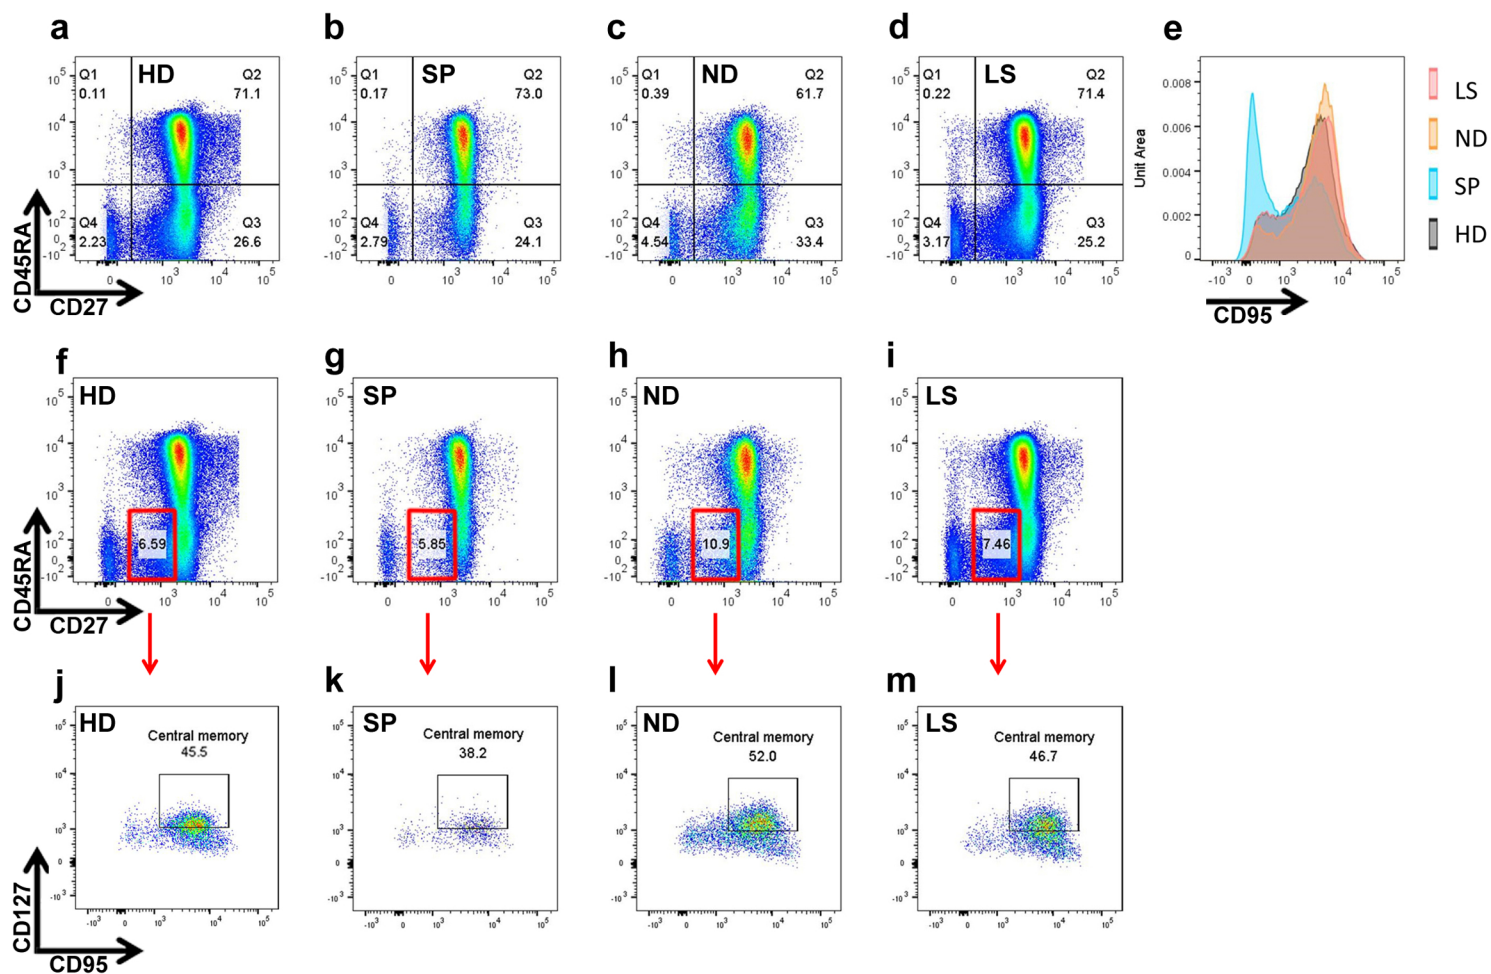

**ESM Figure 3: Representative flow cytometric plots from data in Figure 3.** Quadrant-gated CD4<sup>+</sup> T cells a. HD; b. SP; c. ND; d. LS; e. histogram overlay of CD95 expression in Q3 of the quadrant gated plots (CD27<sup>+</sup>CD45RA<sup>-</sup> T cells). f-i CD4<sup>+</sup> plots with a CD27<sup>int</sup>CD45RA<sup>-</sup> population box-gated manually in FlowJo f. HD; g. SP; h. ND; i. LS; j-m CD127 and CD95 expression in the box gated populations (parts f-i), indicating the central memory population that is analogous to cells shown in Fig 3d of the main text; j. HD; k. SP; l. ND; m. LS. HD, healthy donors; LS, long-standing type 1 diabetes; ND, newly diagnosed type 1 diabetes; SP, slow progressors

ESM Figure 4

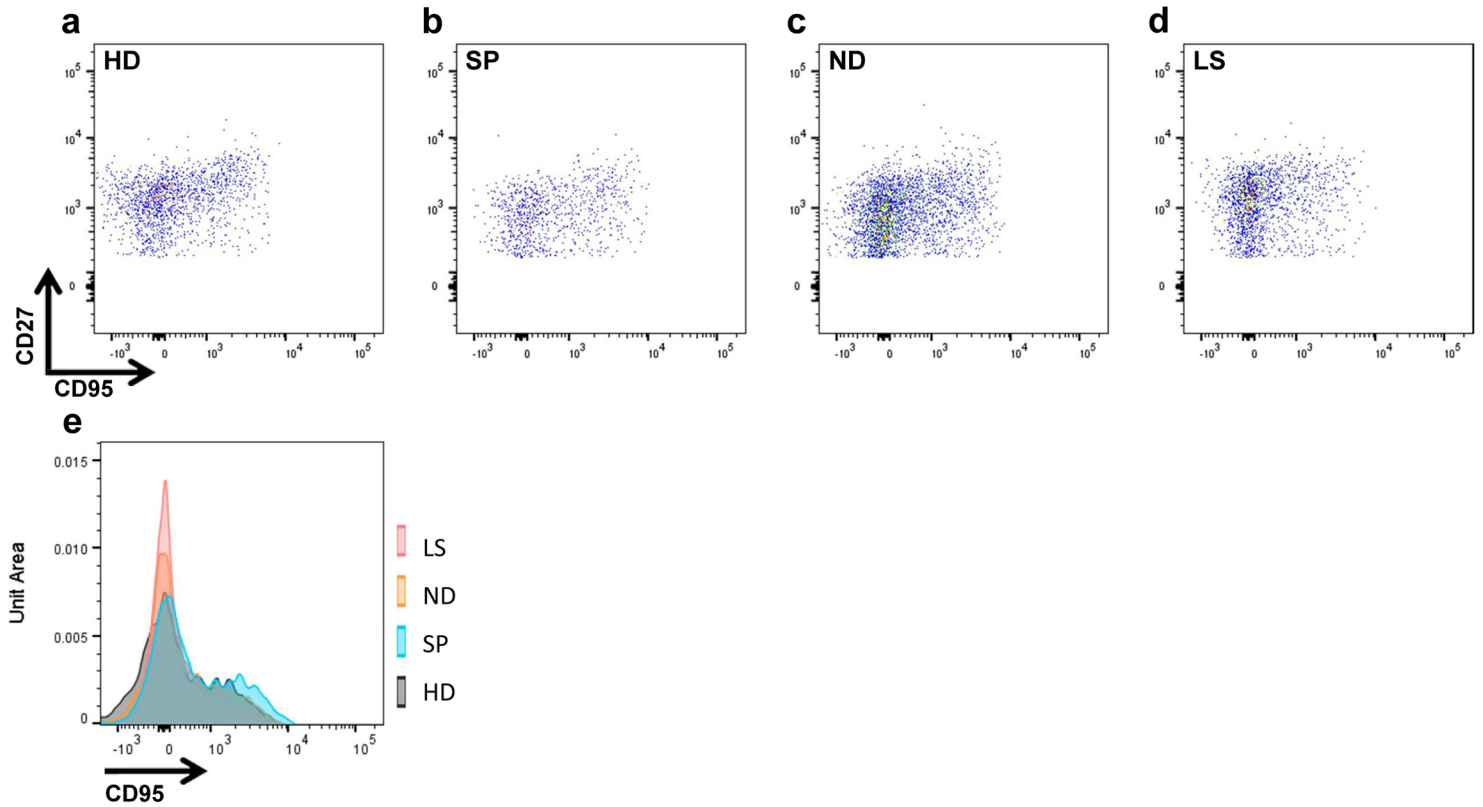

**ESM Figure 4: Representative flow cytometric plots from data in Figure 4.** Switched memory B cells (CD27<sup>+</sup>IgD<sup>-</sup>) from freshly isolated PBMC, manually gated in FlowJo, showing expression of CD27 and CD95: a. HD; b. SP; c. ND; d. LS; e. a histogram of CD95 expression in the switched memory B cells. HD, healthy donors; LS, long-standing type 1 diabetes; ND, newly diagnosed type 1 diabetes; SP, slow progressors



## ESM Figure 5

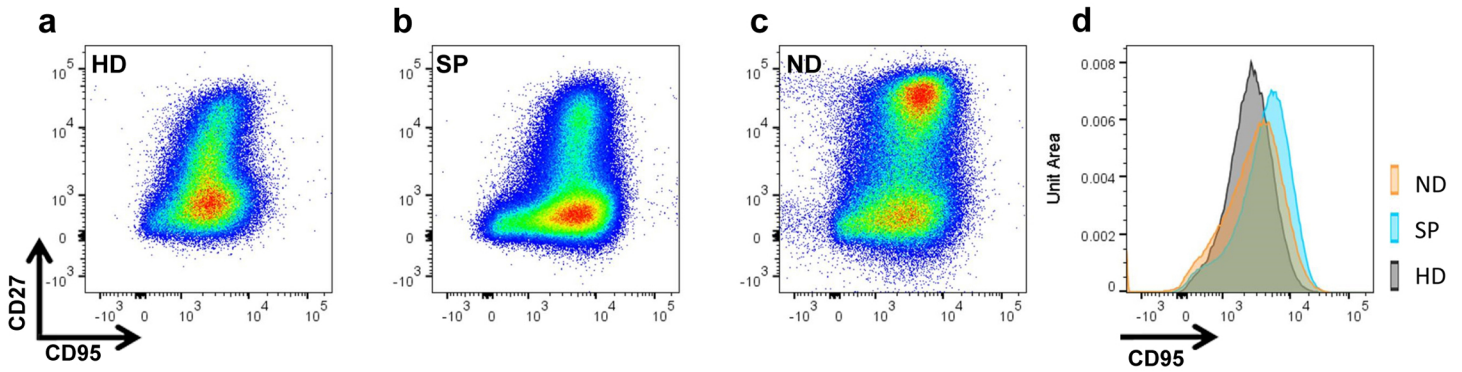

**ESM Figure 5: Representative flow cytometric plots from data in Figure 5. B cells following *ex vivo* stimulation showing expression of CD27 and CD95: a. HD; b. SP; c. ND; d. histogram overlay of CD95 expression in the switched memory B cells. HD, healthy donors; ND, newly diagnosed type 1 diabetes; SP, slow progressors**

ESM Figure 6

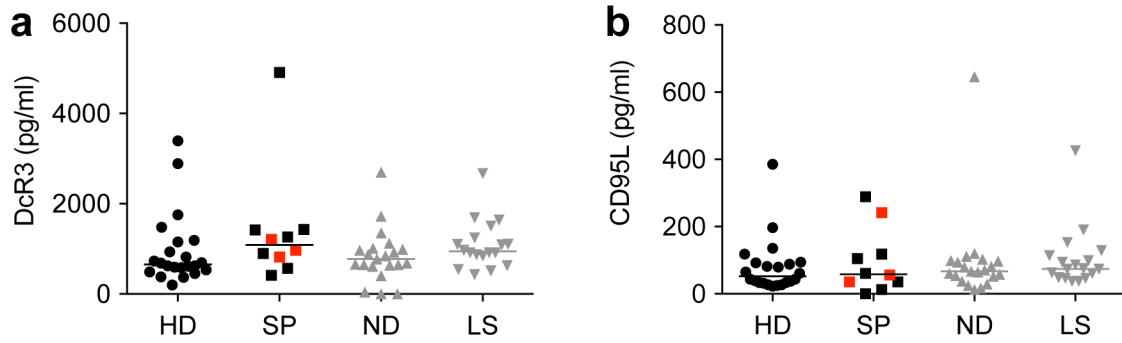

**ESM Figure 6: Serum levels of DcR3 and CD95L.** Serum concentrations of DcR3 and CD95L were measured using ELISAs. ELISA results are shown: a. DcR3; b. CD95L. Horizontal lines indicate median values. Red squares denote slow progressors who tested seropositive for a single islet autoantibody at the time of immune cell analysis. HD, healthy donors; LS, long-standing type 1 diabetes; ND, newly diagnosed type 1 diabetes; SP, slow progressors
